# Supplementary material for: Intravenous Iron Carboxymaltose as a Potential Therapeutic in Anemia of Inflammation
Source: PLoS One. 2016 Jul 12;11(7):e0158599. doi: 10.1371/journal.pone.0158599 (PMC4942094; doi:10.1371/journal.pone.0158599)
Supplement: S3 Data — (XLSX) [file pone.0158599.s003.xlsx]

## Sheet: CBC
			Hb (g/dl)	Hkt (%)	MCV (µm^3)	MCH (pg)	MCHC (g/dl)	WBC (10^3/mm^3)	RBC (10^6/mm^3)	PLT (10^3/mm^3)	RDW(%)	MPV (µm^3)	%LYM	%MO	%GRA	#LYM	#MO	#GRA
Brucella ip iron iv 24h		4	15	49.7	50	15.2	30.1	2.6	9.89	1508	13.3	5.5	69.1	4	26.9	1.8	0.1	0.7
		5	13.5	45.2	53	15.6	29.8	7.5	8.6	800	16.8	6.3	53.6	6.4	40	4	0.4	3.1
		6	13.8	47.4	50	14.6	29.1	6.4	9.44	999	15.3	6.1	43.9	6	50.1	2.8	0.3	3.3
		Mean	14.1	47.4333	51	15.1333	29.6667	5.5	9.31	1102.33	15.1333	5.96667	55.5333	5.46667	39	2.86667	0.266667	2.36667
		SD	0.793725	2.25019	1.73205	0.503322	0.51316	2.57099	0.654752	365.136	1.75594	0.416333	12.7108	1.28582	11.6323	1.10151	0.152753	1.44684
Brucella ip PBS iv 24h		7	12.4	43.9	51	14.4	28.4	4.8	8.66	592	15.5	6.3	44.4	7.5	48.1	2.1	0.3	2.4
		8	11.4	37.3	50	15.3	30.5	4.6	7.43	810	15.9	6.3	58.1	5.5	36.4	2.6	0.2	1.8
		9	12	40.5	54	15.9	29.7	4.4	7.55	1093	15.5	5.8	59.3	5.8	34.9	2.5	0.2	1.7
		Mean	11.9333	40.5667	51.6667	15.2	29.5333	4.6	7.88	831.667	15.6333	6.13333	53.9333	6.26667	39.8	2.4	0.233333	1.96667
		SD	0.503322	3.30051	2.08167	0.754983	1.05987	0.2	0.678159	251.202	0.23094	0.288675	8.27788	1.07858	7.22703	0.264575	0.057735	0.378594
Brucella ip iron iv 7d		10	14.2	47.1	52	15.7	30.2	3.7	9.07	919	13.3	5.5	71.6	4.4	24	2.6	0.1	10
		11	14.6	49	52	15.4	29.8	3.2	9.48	397	17.9	6.7	53.5	6.5	40	1.7	0.2	1.3
		12	16.1	51	51	16.2	31.5	3.9	9.9	1112	14.1	5.4	72	4.7	23.3	2.7	0.1	1.1
		Mean	14.9667	49.0333	51.6667	15.7667	30.5	3.6	9.48333	809.333	15.1	5.86667	65.7	5.2	29.1	2.33333	0.133333	4.13333
		SD	1.00167	1.95021	0.57735	0.404145	0.888819	0.360555	0.41501	369.9	2.45764	0.723418	10.5674	1.13578	9.44616	0.550757	0.057735	5.08167
Brucella ip PBS iv 7d		13	14.6	48.8	49	14.6	29.9	2.2	10	1940	13.4	5.1	82.5	3.7	13.8	1.7	0	0.5
		14	14.1	46.5	48	14.7	30.4	3.5	9.61	1468	13.5	5.1	82.3	4.2	13.5	2.8	0.1	0.6
		15	12.5	40.3	48	15	31.1	4.1	8.33	531	15.5	6.7	62.2	6.1	31.7	2.5	0.2	1.4
		Mean	13.7333	45.2	48.3333	14.7667	30.4667	3.26667	9.31333	1313	14.1333	5.63333	75.6667	4.66667	19.6667	2.33333	0.1	0.833333
		SD	1.09697	4.39659	0.57735	0.208167	0.602771	0.971253	0.873632	717.174	1.18462	0.92376	11.6629	1.26623	10.4223	0.568624	0.1	0.493288
PBS ip PBS iv 7d
		17	16.3	54.4	54	16.1	30	4.3	10.16	921	13.6	5.1	82.1	4.3	13.6	3.5	0.1	0.7
		18	15.4	52.3	51	14.9	29.4	4.6	10.3	1213	13.2	5.2	85.9	3.1	11	3.9	0.1	0.6
		19	15.8	52	52	15.7	30.4	3.7	10.08	1501	13.4	5.2	78.2	3.6	18.2	2.8	0.1	0.8
		Mean	15.8333	52.9	52.3333	15.5667	29.9333	4.2	10.18	1211.67	13.4	5.16667	82.0667	3.66667	14.2667	3.4	0.1	0.7
		SD	0.450925	1.30767	1.52753	0.61101	0.503322	0.458258	0.111355	290.002	0.2	0.057735	3.85011	0.602771	3.646	0.556776	1.69967e-17	0.1
		16	14.7	49.6	51	15.1	15.1	3.5	9.76	1524	29.7	13.2	5.4	68.6	5.5	25.9	2.4	0.1	problems with blood draw excluded

## Sheet: Serum iron (24h after Iron, PBS
Iron preread	1	2	3	4	5	6	7	8	9	10	11	12
A	0.037	0.037	0.037	0.037	0.037	0.037	0.037	0.037	0.038				540
B	0.036	0.036	0.036	0.036	0.036	0.036	0.036	0.036	0.037				540
C	0.161	0.156	0.086	0.091	0.095	0.099	0.048	0.051	0.046	0.053	0.048	0.043	540
D	0.046	0.044	0.043	0.044	0.048	0.046							540
E													540
F													540
G													540
H													540
Iron postread	1	2	3	4	5	6	7	8	9	10	11	12
A	0.04	0.04	0.04	0.043	0.046	0.052	0.065	0.089	0.143				540
B	0.038	0.038	0.04	0.042	0.044	0.05	0.064	0.088	0.139				540
C	0.635	0.585	0.351	0.323	0.331	0.35	0.12	0.12	0.096	0.101	0.112	0.112	540
D	0.117	0.128	0.177	0.139	0.18	0.154							540
E													540
F													540
G													540
H													540
standard curve												µmol/l
µg/dl	0	0.69	1.39	2.78	5.56	11.25	22.5	44.5	89			0	0.0025
OD540	0.003	0.003	0.003	0.006	0.009	0.015	0.028	0.052	0.105			0.69	0.0025
	0.002	0.002	0.004	0.006	0.008	0.014	0.028	0.052	0.102			1.39	0.0035
Mean	0.0025	0.0025	0.0035	0.006	0.0085	0.0145	0.028	0.052	0.1035			2.78	0.006
												5.56	0.0085
samples	1	2	3	4	5	6	7	8	9			11.25	0.0145
OD540_1				0.072	0.05	0.064	0.071	0.134	0.132			22.5	0.028
OD540_2				0.069	0.048	0.069	0.084	0.095	0.108			44.5	0.052
Mean				0.0705	0.049	0.0665	0.0775	0.1145	0.12			89	0.1035
µmol/l				62.1818	42.6364	58.5455	68.5455	102.182	107.182

## Sheet: Serum iron (7d after Iron, PBS)
Iron preread	1	2	3	4	5	6	7	8	9	10	11	12
A	0.038	0.037	0.037	0.037	0.04	0.037	0.037	0.037	0.038				540
B	0.035	0.036	0.036	0.036	0.036	0.036	0.036	0.036	0.038				540
C	0.058	0.064	0.064	0.068	0.05	0.053	0.068	0.077	0.052	0.053	0.049	0.045	540
D	0.054	0.058	0.05	0.048	0.064	0.067	0.061	0.056					540
E													540
F													540
G													540
H													540
Iron postread	1	2	3	4	5	6	7	8	9	10	11	12
A	0.04	0.04	0.041	0.042	0.048	0.051	0.064	0.089	0.142				540
B	0.037	0.039	0.039	0.043	0.044	0.051	0.063	0.086	0.136				540
C	0.19	0.199	0.275	0.28	0.267	0.255	0.155	0.162	0.172	0.189	0.222	0.25	540
D	0.251	0.256	0.086	0.081	0.138	0.135	0.172	0.203					540
E													540
F													540
G													540
H													540
standard curve
µg/dl	0	0.69	1.39	2.78	5.56	11.25	22.5	44.5	89				µmol/l
OD540	0.002	0.003	0.004	0.005	0.008	0.014	0.027	0.052	0.104				0	0.002
	0.002	0.003	0.003	0.007	0.008	0.015	0.027	0.05	0.098				0.69	0.003
Mean	0.002	0.003	0.0035	0.006	0.008	0.0145	0.027	0.051	0.101				1.39	0.0035
													2.78	0.006
samples	10	11	12	13	14	15	16	17	18	19			5.56	0.008
OD540_1	0.132	0.211	0.217	0.087	0.12	0.173	0.197	0.036	0.074	0.111			11.25	0.0145
OD540_2	0.135	0.212	0.202	0.085	0.136	0.205	0.198	0.033	0.068	0.147			22.5	0.027
Mean	0.1335	0.2115	0.2095	0.086	0.128	0.189	0.1975	0.0345	0.071	0.129			44.5	0.051
µmol/l	119.455	190.364	188.545	76.2727	114.455	169.909	177.636	29.4545	62.6364	115.364
							excluded

## Sheet: summary serum iron
group		sample	Iron µmol/l
Brucella ip iron iv 24h		4	62.1818
		5	42.6364
		6	58.5455
		Mean	54.4545
		SD	10.3951
Brucella ip PBS iv 24h		7	68.5455
		8	102.182
		9	107.182
		AV	92.6364
		STABW	21.0126
Brucella ip iron iv 7d		10	119.455
		11	190.364
		12	188.545
		Mean	166.121
		SD	40.4247
Brucella ip PBS iv 7d		13	76.2727
		14	114.455
		15	169.909
		Mean	120.212
		SD	47.083
PBS ip PBS iv 7d
		17	29.4545
		18	62.6364
		19	115.364
		Mean	69.1515
		SD	43.3235

## Sheet: liver qPCR
Sample no		Target				Ct Sybr			Endo	Ct Sybr	2^-(Sybr -18S)	Norm 1	Norm 2	AVG	STDEV	AVG	T-Test
4		hepcidin	Brucella/FE 24			14.536			18s	5.446	0.00183501	1.71304	7.29322	1.43233	0.276448
5						15.057			18s	5.405	0.00124296	1.16035
6						14.79			18s	5.433	0.00152497	1.42361
7			Brucella/PBS 24h			16.952			18s	5.423	0.000338396	0.315903		0.783389	0.439122
8						15.562			18s	5.456	0.000907383	0.847071
9						15.221			18s	5.602	0.00127172	1.18719
10			Brucella/FE 7d			14.968			18s	5.595	0.00150815	1.40791		1.37088	0.0918996
11						15.03			18s	5.688	0.00154091	1.43849
12						14.987			18s	5.461	0.0013564	1.26624
13			Brucella/PBS 7d			14.452			18s	5.186	0.00162426	1.5163		1.08429	0.377171
14						15.352			18s	5.359	0.000981312	0.916086
15						15.244			18s	5.092	0.000878908	0.820488
16			PBS/PBS 7d			15.01			18s	5.417	0.00129485	1.20878		1	0.162	0.0010712
17						15.253			18s	5.437	0.0011094	1.03566
18						15.32			18s	5.337	0.000988138	0.922458
19						15.433			18s	5.303	0.000892414	0.833096

## Sheet: RPI
									*10e6/mm³
					Percent positive Reticulocytes				Absolute reticulocyte counts
GC stained	GC unstained	%retic GC	group	Sample Nr	%gated stained tube	%gated unstained	%reticulocytes		RBCs (*10e12)	Absolute reticulocytes		Hkt (%)	Corrected % reticulocytes		Hbg	RPI-Reticulocyte Product Index			Mean	SD
			Bru/Fe 24h	4	2.44	0.02	2.42		10.07	0.243694		50.9	2.73729		15.2	2.54385			16.5391	10.9237
				5	27.82	0.04	27.78		9.81	2.72522		51.9	32.0396		15.2	29.2017
				6	25.15	0.06	25.09		7.14	1.79143		35.7	19.9047		10.3	17.8719
			Bru/PBS 24h	7	32	0.19	31.81		9.06	2.88199		45.9	32.4462		13.2	29.0382			21.8501	5.1508
				8	21.93	0.07	21.86		7.43	1.6242		37.3	18.1195		11.4	17.234
				9	23.32	0.09	23.23		7.55	1.75387		40.5	20.907		12	19.278
			Bru/Fe 7d	10	2.84	0.01	2.83		9.07	0.256681		47.1	2.96207		14.2	2.77911			4.60816	2.41247
				11	8	0.06	7.94		9.48	0.752712		49	8.64578		14.6	8.01687
				12	2.82	0.1	2.72		9.9	0.26928		51	3.08267		16.1	3.02849
			Bru/PBS 7d	13	2.65	0	2.65		10	0.265		48.8	2.87378		14.6	2.67566			4.01784	2.47327
				14	1.95	0.01	1.94		9.61	0.186434		46.5	2.00467		14.1	1.8917
				15	8.68	0.02	8.66		8.33	0.721378		40.3	7.75551		12.5	7.48617
			PBS/PBS 7d	16	2.33	0	2.33		9.76	0.227408		49.6	2.56818		14.7	2.36867			2.42414	0.12147
				17	2.43	0.13	2.3		10.16	0.23368		54.4	2.78044		16.3	2.59267
				18	2.18	0.01	2.17		10.3	0.22351		52.3	2.52202		15.4	2.31107

## Sheet: LIC-liver iron content
1. Measurement
sample	wet weight	OD540	OD540 (1:100)	µg Fe	µg/g	µg/dl	group			Standard	OD 540	real iron per well [µg]
										0	0	0
										62.5	0.031	0.0208333
										125	0.064	0.0416667
4	0.05	0.335	0.043	2.11921	847.684	31.7882	Bru/Fe 24h			250	0.13	0.0833333
5	0.03	0.167	0.018	1.05644	704.295	26.4111				500	0.265	0.166667
6	0.05	0.222	0.02	1.40437	561.749	21.0656
7	0.05	0.03	0.003	0.18978	75.912	2.8467	Bru/PBS 24h
8	0.06	0.03	0.003	0.18978	63.26	2.37225
9	0.02	0.17	0.002	0.107542	107.542	4.03283
10	0.03	0.022	0.013	0.139172	92.7813	3.4793	Bru/Fe 7d
11	0.05	0.139	0.027	0.879314	351.726	13.1897
12	0.02	0.215	0.03	1.36009	1360.09	51.0034
13	0.04	0.031	0.005	0.196106	98.053	3.67699	Bru/PBS 7d
14	0.01	0.019	0.003	0.120194	240.388	9.01455
15	0.05	0.038	0.004	0.240388	96.1552	3.60582
16	0.02	0.037	0.005	0.234062	234.062	8.77733	PBS/PBS 7d
17	0.01	0.015	0.003	0.09489	189.78	7.11675
18	0.04	0.035	0.004	0.22141	110.705	4.15144
19	0.04	0.021	0.003	0.132846	66.423	2.49086
2. Measurement (replicates measured)
sample	wet weight	OD540	OD 540	(1:10) OD540	(1:10) OD540	Mean540	Mean 540 1:10	µg Fe	µg/g	µg/dl	group
4	0.02	0.386	0.383	0.188	0.22	0.3845	0.204	1.96962	1969.62	73.8608	Bru/Fe 24h
5	0.03	0.342	0.344	0.133	0.128	0.343	0.1305	1.25998	839.985	31.4994
6	0.04	0.352	0.36	0.196	0.195	0.356	0.1955	1.88755	943.776	35.3916
7	0.04	0.218	0.232	0.022	0.022	0.225	0.022	0.21241	106.205	3.98269	Bru/PBS 24h
8	0.058	0.295	0.318	0.03	0.031	0.3065	0.0305	0.294478	101.544	3.8079
9	0.03	0.233	0.246	0.023	0.024	0.2395	0.0235	0.226892	151.262	5.67231
10	0.01	0.37	0.367	0.092	0.094	0.3685	0.093	0.897915	1795.83	67.3436	Bru/Fe 7d
11	0.04	0.49	0.454	0.201	0.187	0.472	0.194	1.87307	936.535	35.1201
13	0.02	0.407	0.423	0.038	0.041	0.415	0.0395	0.381373	381.373	14.3015	Bru/PBS 7d
14	0.02	0.274	0.296	0.029	0.029	0.285	0.029	0.279995	279.995	10.4998
15	0.02	0.204	0.205	0.02	0.022	0.2045	0.021	0.202755	202.755	7.60331
16	0.04	0.43	0.436	0.08	0.076	0.433	0.078	0.75309	376.545	14.1204	PBS/PBS 7d
17	0.02	0.321	0.345	0.031	0.031	0.333	0.031	0.299305	299.305	11.2239
18	0.01	0.177	0.187	0.017	0.019	0.182	0.018	0.175721	351.442	13.1791
19	0.04	0.432	0.415	0.04	0.044	0.4235	0.042	0.40551	202.755	7.60331
Standard	OD 540	real iron per well [µg]
0	0	0
62.5	0.033	0.03125
125	0.067	0.0625
250	0.13	0.125
500	0.258	0.25
Summary
	1. measure	2.measure
sample	µg/g	µg/g	AV	SD		Mean	SD
4	847.684	1969.62	1408.65	793.329	Bru/Fe 24h	977.851	304.725
5	704.295	839.985	772.14	95.9476
6	561.749	943.776	752.763	270.134
7	75.912	106.205	91.0585	21.4204	Bru/PBS 24h	100.954	20.4237
8	63.26	101.544	82.402	27.0709
9	107.542	151.262	129.402	30.9145
10	92.7813	1795.83	944.306	1204.24	Bru/Fe 7d	1148.17	515.352
11	351.726	936.535	644.13	413.523
12	1360.09	2352.09	1856.09	701.447
13	98.053	381.373	239.713	200.337	Bru/PBS 7d	216.453	48.1068
14	240.388	279.995	260.192	28.0064
15	96.1552	202.755	149.455	75.3774
16	234.062	376.545	305.303	100.751	PBS/PBS 7d	228.877	61.1994
17	189.78	299.305	244.543	77.4459
18	110.705	351.442	231.073	170.227
19	66.423	202.755	134.589	96.4013

## Sheet: data summary
	Haemoglobin 24h				Hepcidin qPCR 24h				Serum iron 24h				LIC 24h				RPI 24h
	PBS/PBS	BA/PBS	BA/Fe		PBS/PBS	BA/PBS	BA/Fe		PBS/PBS	BA/PBS	BA/Fe		PBS/PBS	BA/PBS	BA/Fe		PBS/PBS	BA/PBS	BA/Fe
	16.3	12.4	15		1.20878	0.315903	1.71304		29.4546	68.5455	62.1818		305.303	91.0585	1408.65		2.36867	29.0382	2.54385
	15.4	11.4	13.5		1.03566	0.847071	1.16035		62.6364	102.182	42.6364		244.542	82.402	772.14		2.59267	17.234	29.2017
	15.8	12	13.8		0.922458	1.18719	1.42361		115.364	107.182	58.5455		231.073	129.402	752.763		2.31107	19.278	17.8718
					0.833096								134.589
Mean	15.8333	11.9333	14.1		1	0.783389	1.43233		69.1515	92.6364	54.4545		228.877	100.954	977.851		2.42414	21.8501	16.5391
SD	0.368179	0.410961	0.648074		0.140296	0.358542	0.225719		35.3735	17.1567	8.48756		61.1994	20.4236	304.725		0.12147	5.1508	10.9237
	Haemoglobin 7d								Serum Iron 7d				LIC 7d				RPI 7d
	PBS/PBS	BA/PBS	BA/Fe		PBS/PBS	BA/PBS	BA/Fe		PBS/PBS	BA/PBS	BA/Fe		PBS/PBS	BA/PBS	BA/Fe		PBS/PBS	BA/PBS	BA/Fe
	16.3	14.6	14.2		1.20878	1.5163	1.40791		161.5	419	656.5		305.303	239.713	944.306		2.36867	2.67566	2.77912
	15.4	14.1	14.6		1.03566	0.916086	1.43849		344	629	1046.5		244.542	260.192	644.13		2.59267	1.8917	8.01687
	15.8	12.5	16.1		0.922458	0.820488	1.26624		634	934	1036.5		231.073	149.455	1856.09		2.31107	7.48617	3.02849
					0.833096								134.589
Mean	15.8333	13.7333	14.9667		1	1.08429	1.37088		379.833	660.667	913.167		228.877	216.453	1148.17		2.42414	4.01784	4.60816
SD	0.368179	0.895669	0.817856		0.140296	0.307959	0.0750356		194.554	211.437	181.537		61.1994	48.1068	515.352		0.12147	2.47327	2.41247
